# Supplementary material for: Mesoporous silica nanoparticles with lactose-mediated targeting effect to deliver platinum(iv) prodrug for liver cancer therapy
Source: Royal Society of Chemistry journal article supplement (doi:10.1039/c7tb01704a), 2017-01-01
Supplement: c7tb01704a1.pdf [file c7tb01704a1.pdf]

## **Supporting information**

### **Lactose targeting mesoporous silica nanoparticles to deliver platinum(IV) prodrug for liver cancer therapy**

Zigui Wang,<sup>a,b</sup> Peng Wu,<sup>c</sup> Zhilong He,<sup>d</sup> Hongyan He,<sup>a</sup> Weifeng Rong,<sup>e</sup> Jizhen Li,<sup>\*c</sup>  
Dongfang Zhou<sup>\*a</sup> and Yubin Huang<sup>a</sup>

<sup>a</sup> State Key Laboratory of Polymer Physics and Chemistry Changchun Institute of Applied Chemistry, Chinese Academy of Sciences, Changchun 130022, P. R. China

<sup>b</sup> University of Science and Technology of China, Hefei 230026, PR China

<sup>c</sup> College of Chemistry, Jilin University, Changchun 130023, PR China

<sup>d</sup> Department of Medical Oncology, The First Affiliated Hospital of South China University, Hengyang 421001, PR China.

<sup>e</sup> Shandong Institute of Nonmetallic Materials, Jinan 250031, PR China.

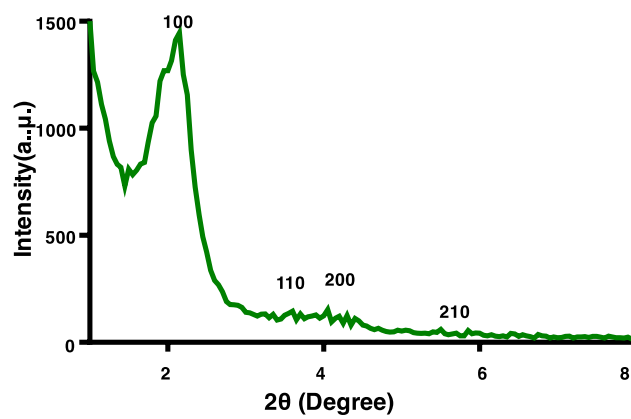

Fig. S1 XRD spectrum of MSN-1.

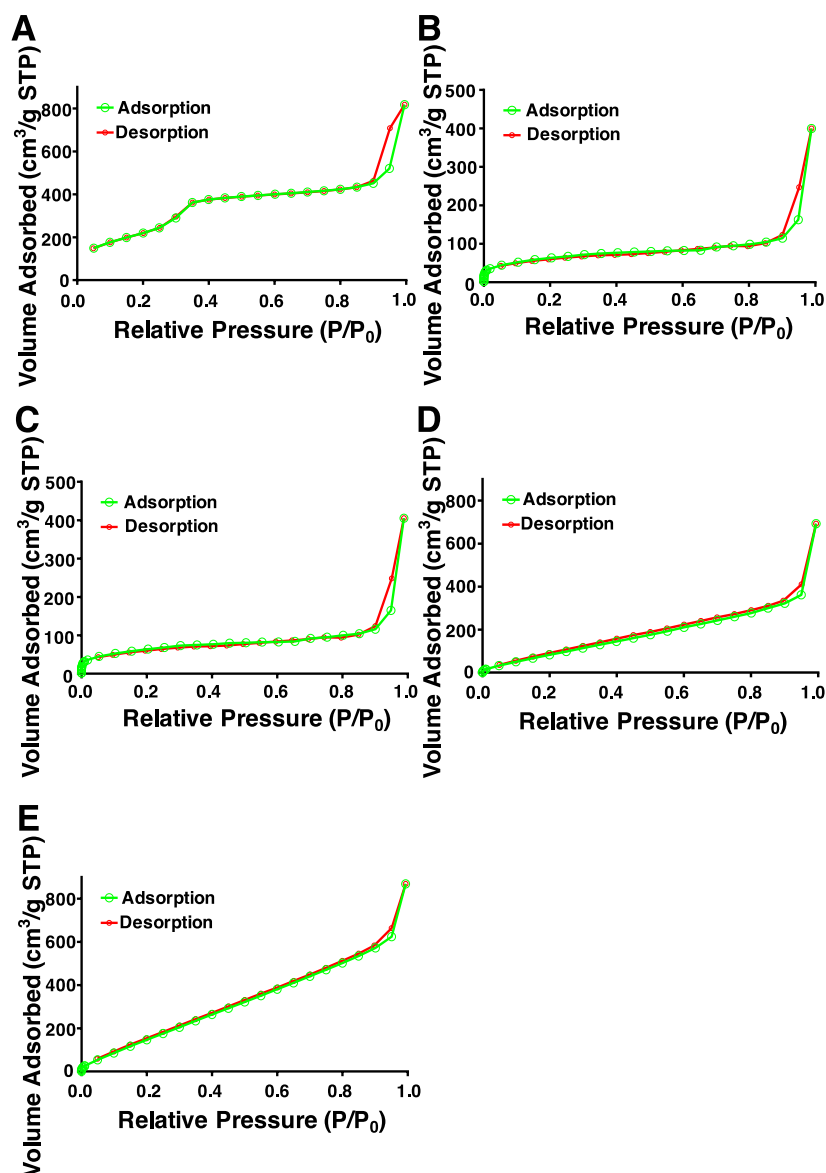

**Fig. S2 Nitrogen adsorption–desorption isotherms** of (A) MSN-1, (B) MSN-P/LA, (C) MSN-P/LA-Pt, (D) MSN-P and (E) MSN-P-Pt. The specific surface area was 1134 m<sup>2</sup>/g, 380 m<sup>2</sup>/g, 225 m<sup>2</sup>/g, 836 m<sup>2</sup>/g and 449 m<sup>2</sup>/g, respectively.

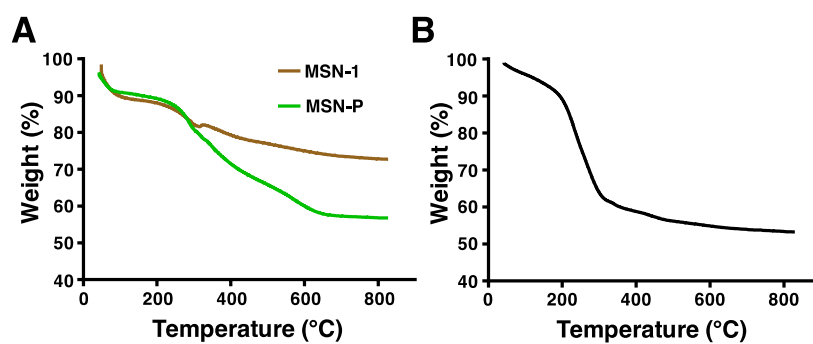

**Fig. S3** TGA curves of (A) MSN-1 and MSN-P under air condition and (B) unmodified MSN under N<sub>2</sub> atmosphere.

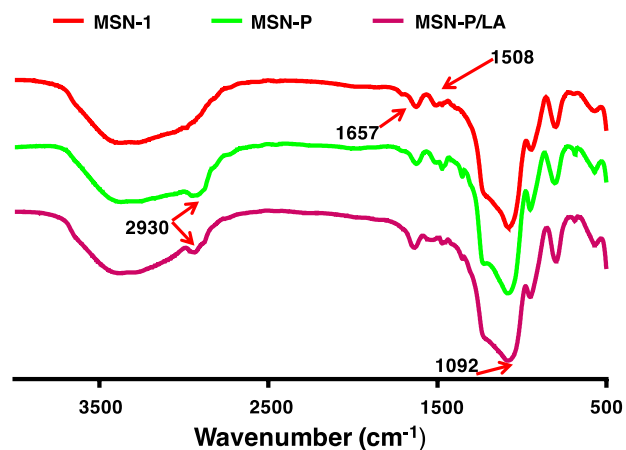

**Fig. S4 FT-IR spectra of MSN-1, MSN-P and MSN-P/LA.** The peaks at 962 cm<sup>-1</sup> and 1092 cm<sup>-1</sup> were ascribed to the stretching vibration of C–O and siloxane (–Si–O–Si–). After modification with amino, new peaks appeared at 1508 cm<sup>-1</sup> and 1657 cm<sup>-1</sup> were ascribed to the bending vibration of –NH<sub>2</sub>. After modification with mPEG<sub>2k</sub>, new peak belonging to the stretching vibration of mPEG<sub>2k</sub> was appeared at 2930 cm<sup>-1</sup>. After conjugation of LA, the peaks of LA at 1657 cm<sup>-1</sup> and 1536 cm<sup>-1</sup> were overlapped with those of MSN-1.

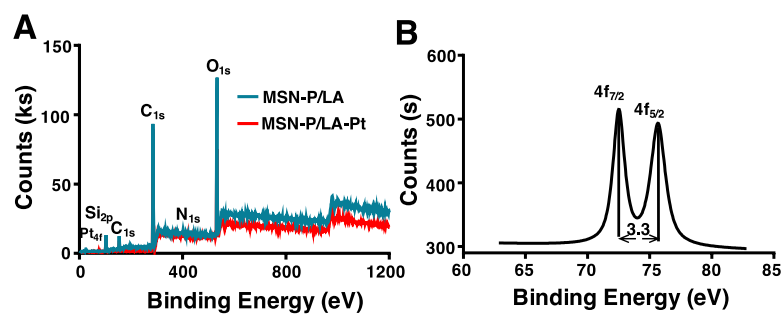

**Fig. S5** (A) Wide scan XPS spectra of MSN-P/LA and MSN-P/LA-Pt; (B) Deconvoluted XPS spectrum of  $\text{Pt}_{4f}$ .

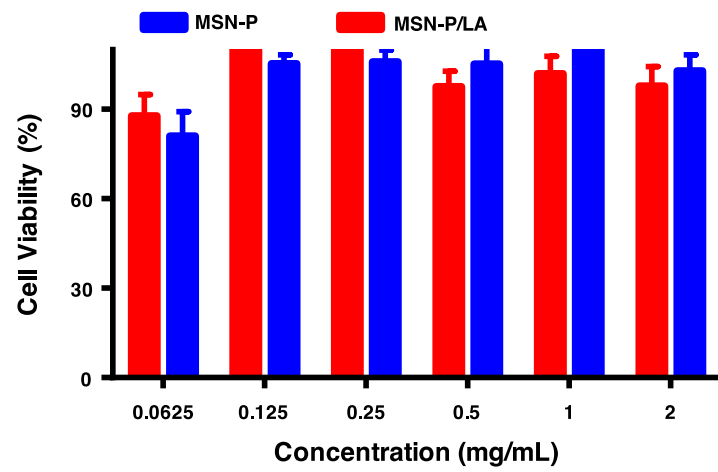

**Fig. S6** Viability of L929 cells after treated with different concentration of MSN-P and MSN-P/LA for 48 h.

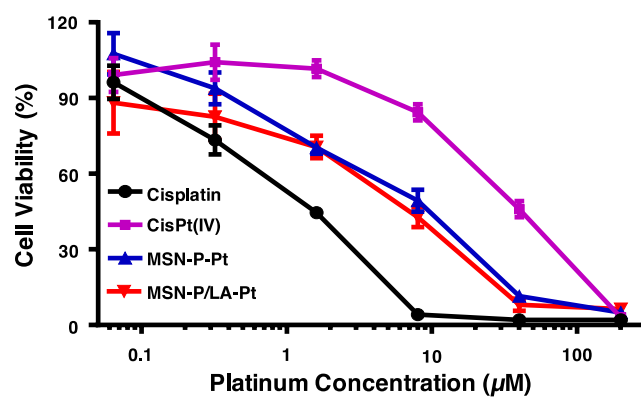

**Fig. S7** Cytotoxicity curves of cisplatin, CisPt(IV), MSN-P-Pt and MSN-P/LA-Pt nanoparticles against HepG-2 cells for 72 h.
